# Supplementary material for: Synthesis of random copolymer based pH-responsive nanoparticles as drug carriers for cancer therapeutics
Source: Royal Society of Chemistry journal article supplement (doi:10.1039/c3py00390f), 2013-01-01
Supplement: c3py00390f.pdf [file c3py00390f.pdf]

## Supplementary Information

### SYNTHESIS OF RANDOM COPOLYMER BASED PH-RESPONSIVE NANOPARTICLES AS DRUG CARRIERS FOR CANCER THERAPEUTICS

*Apiradee Honglawan<sup>1</sup>, Houping Ni<sup>2</sup>, Drew Weissman<sup>2</sup> and Shu Yang<sup>1,3\*</sup>*

<sup>1</sup>Department of Chemical and Biomolecular Engineering

<sup>2</sup>Division of Infectious Disease

<sup>3</sup>Department of Materials Science and Engineering

University of Pennsylvania

3231 Walnut Street

Philadelphia, PA 19104-8296

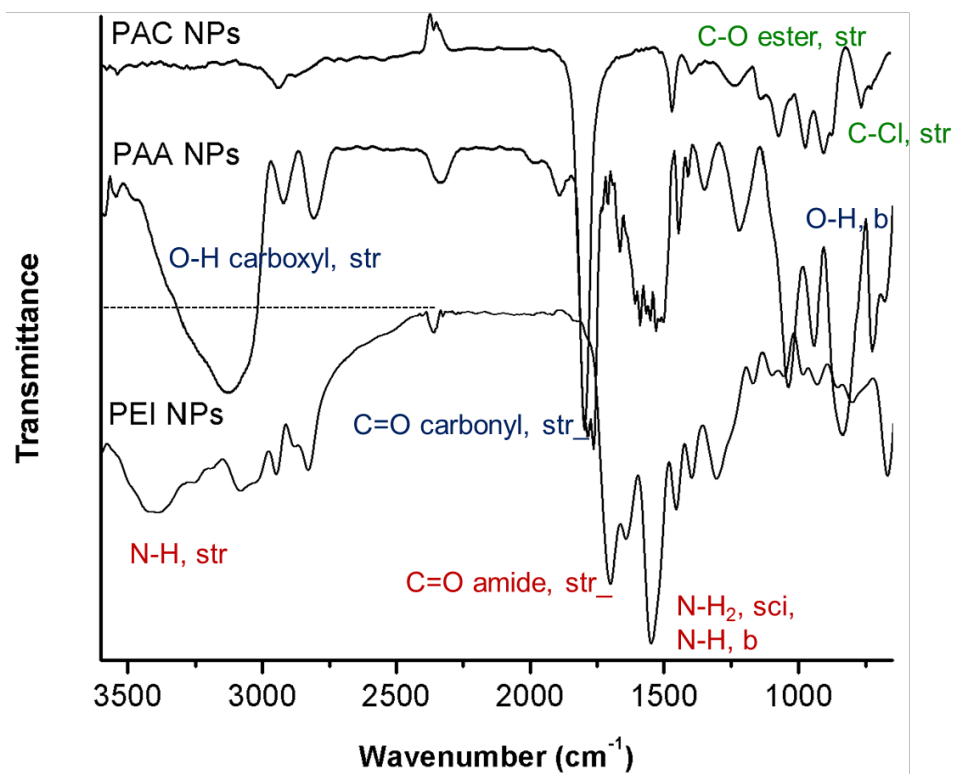

**Figure S1.** FT-IR spectra of different nanoparticles: PAC NPs, PAA NPs and PEI NPs.

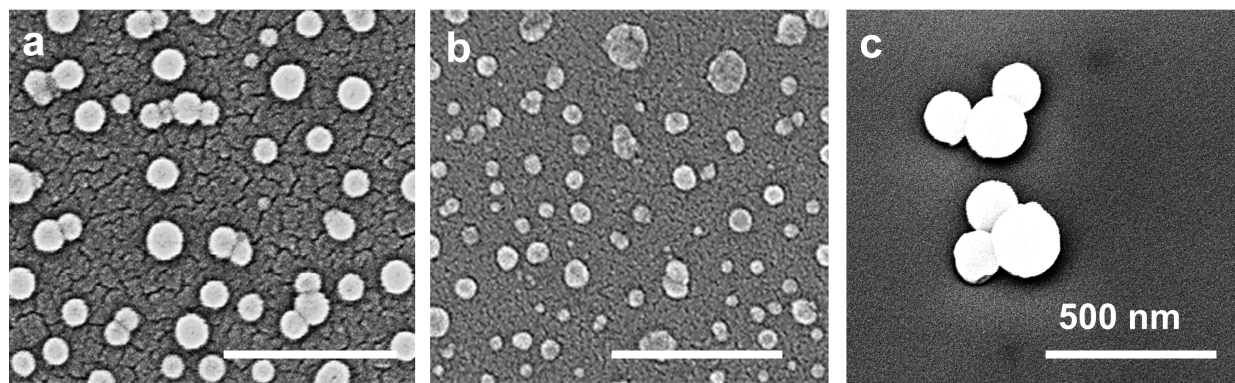

**Figure S2.** SEM images of particles modified at different states: PAC NPs (a), PAA NPs (b), and PEI NPs (c).

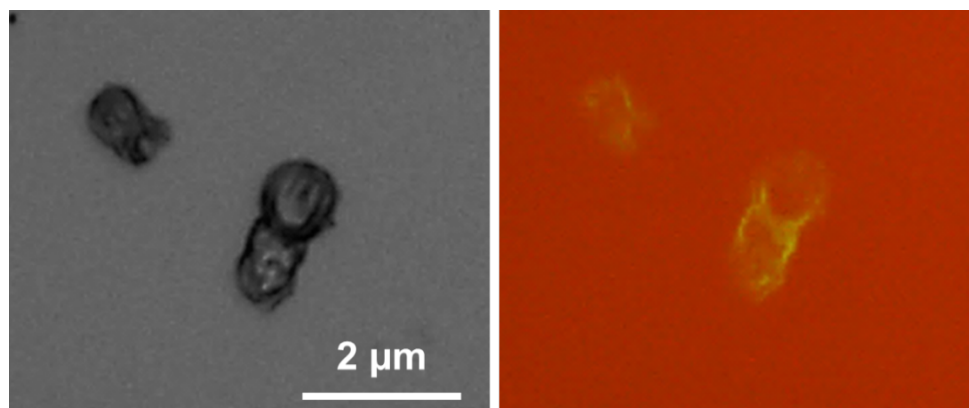

**Figure S3.** Optical (left) and fluorescent (right) images of FITC tagged PEI NPs drop-cast onto a clean Si-wafer at a particle concentration of  $\sim 1$  mg/mL in aqueous solution. Large particles were synthesized at high UV dosage of  $4,000$  mJ/cm<sup>2</sup> prior to surface modification with FITC tagged PEI (MW 10,000) at a ratio of FITC to PEI = 3:1 (molar).

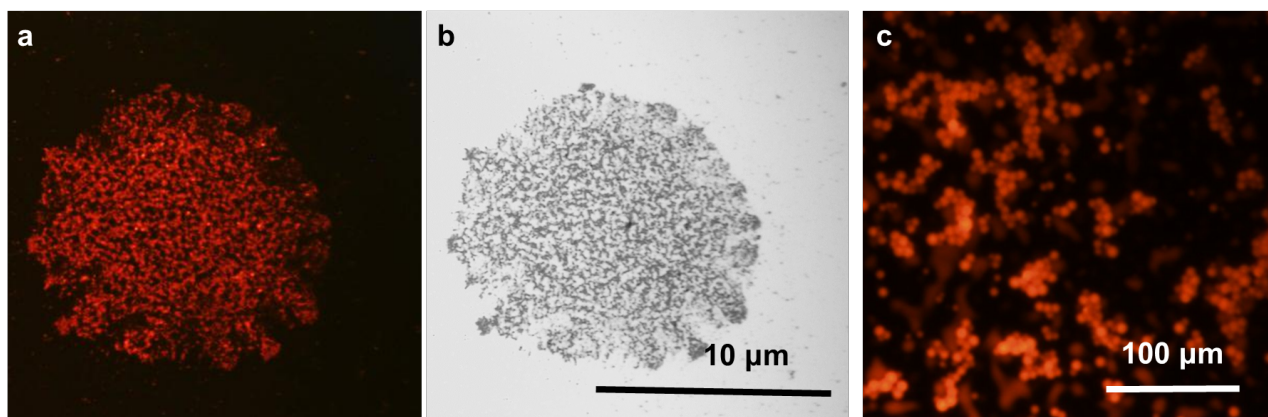

**Figure 4S.** Fluorescent (a) and corresponding optical (b) images of Dox/PEI NP aggregates. (c) Fluorescent image of Dox loaded PEI microparticles from ranPAC synthesized at a high UV dosage of 4,000 mJ/cm<sup>2</sup> (strategy 1). The Dox loaded particles were deposited on a Si-wafer and imaged using a Leica SP5 confocal microscope.
